# Supplementary material for: TGFβ and CCN2/CTGF mediate actin related gene expression by differential E2F1/CREB activation
Source: PubMed Central journal article supplement (PMC3765338; doi:10.1186/1471-2164-14-525), 2013-08-01

Figure 6

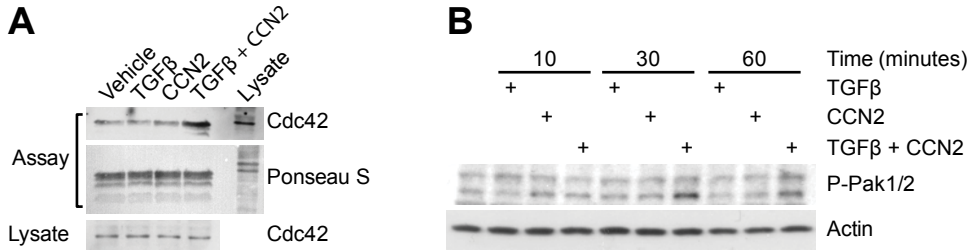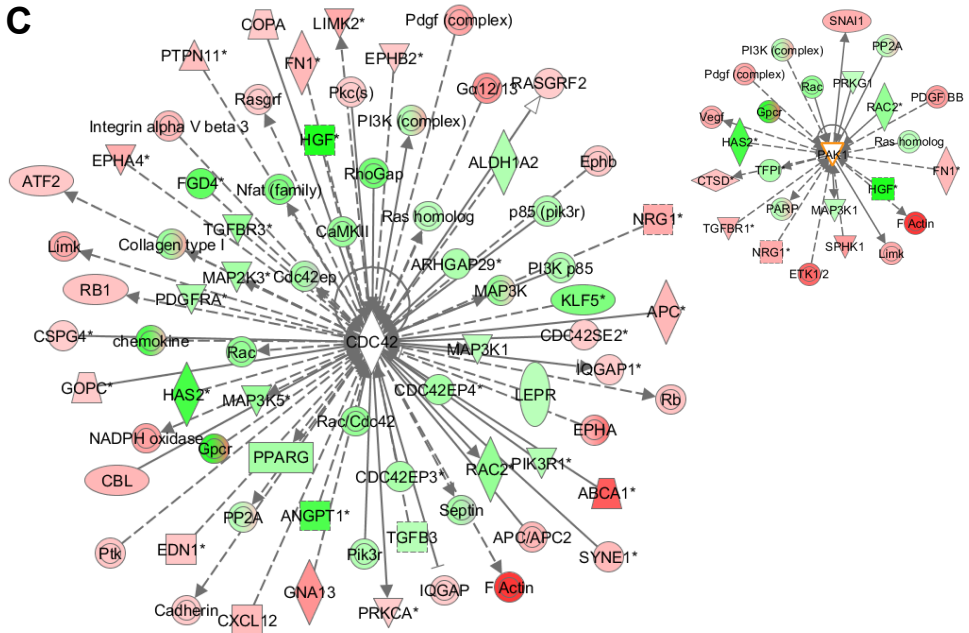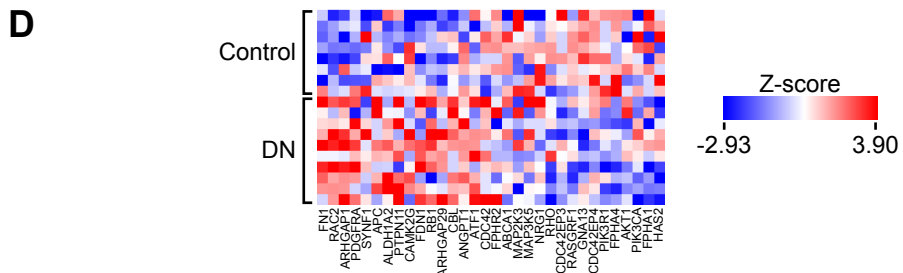

Supplement: 1471-2164-14-525-S7.pdf [file 1471-2164-14-525-S7.pdf]
